# Supplementary material
Source: Research Square preprint supplement (doi:10.21203/rs.3.rs-10312612/v1)
Supplement: Supplementary file 1 [file 29e838dba673500658e265d8.docx]

**Supplemental File 1 – Interview Guide**

**Introduction and Background:**

- Could you tell me a bit about yourself and your background?

- How long have you lived in Australia?

- How many languages do you speak? How confident are you with English?

**Childhood Experiences with Asthma and Stigma**

Narrative Prompt: “Can you tell me about when you were first diagnosed with asthma? What do you remember about that time in your life?”

Probes (if needed):

- How would you describe your experience dealing with asthma?

- How did your family respond to your diagnosis?

- What was it like managing asthma at school or with friends?

- Did this change over time? Were your experiences as a teenager similar, or different to those as a child?

- Were there times you felt different or excluded because of your asthma?

- Can you recall any specific incidents where you felt embarrassed, ashamed, or stigmatised?

- How did others (teachers, peers, siblings) talk about asthma?

**Asthma in Working or Middle Adult Life**

Narrative Prompt: “Thinking about your adult life—work, relationships, parenting— has asthma featured in those parts of your life?”

Probes (if needed):

- Did you notice changes in your asthma from childhood to adulthood?

- Did asthma ever affect your career choices or work life?

- How did you manage asthma during busy or stressful periods?

- Were there times you avoided disclosing your asthma to others? Why or why not? Did asthma impact your work? For example, did you need to take leave from work because of an asthma exacerbation?

- (IF MENTIONED EARLIER) Did your experiences of stigma change as you got older?

- Do you have children?

- (IF WOMAN) Did your asthma impact your pregnancy at all? Did the doctors talk to you about asthma and pregnancy? Did you consider changing the medicines you used for asthma when you were pregnant?

- (ALL) Do you feel asthma has impacted your experiences with your children at all?

- (ALL) Have your experiences of asthma impacted how you approach the health of your children at all?

**Asthma in Older Age**

Narrative Prompt: “How would you describe your experience of living with asthma now, at this stage of your life?”

Probes (if needed):

- How did it change from early adulthood to today?

- Has your asthma changed over time?

- How do you feel about managing asthma now compared to earlier in life?

- Are there things you do differently now in terms of self-care or medication use?

- Do you still carry memories or feelings from earlier experiences of stigma?

- Do you have a written asthma action plan? Do you talk about this with your doctor when you see them for your asthma?

**Medications and Management**

Narrative Prompt: “Let’s talk about asthma medications. Can you tell me about your experiences using them over the years?”

Probes (if needed):

- What was your experience with preventer inhalers as a child?

- Did you need to take your reliever at school, perhaps before sport, or if you were feeling breathless playing at recess or lunch?

- As an adult, did you take your preventer regularly? Did things like work or caring for the children ever interfere?

- Have you ever avoided using medication? If so, why?

- How do you feel about using preventers now?

- Have your attitudes toward medication changed over time?

- If you could give your younger self advice about using asthma medicines, what would it be? Were there any areas that you believed could have been better in terms of your management of asthma?

**Health Literacy and Interactions with Doctors**

Narrative Prompt: “Can you tell me about your experiences with doctors or other health professionals when it comes to asthma?”

Probes:

- Thinking about the times you’ve talked with doctors about your asthma, how well do you feel asthma has been explained to you over the years?

- Follow up, have you noticed changes in this over time?

- Have you ever felt dismissed or not taken seriously by a doctor?

- How confident do you feel in talking with your doctor now about your asthma? What about when you were a child? Did you feel the same then? (yes/no what changed?)

- Do you see a GP who speaks your native/preferred language?

- Have you ever experienced any problems understanding what the doctors tell you about your asthma?

- Have you ever challenged or questioned medical advice? Why or why not?

- Do you believe you had the knowledge and information around asthma and your medication to understand asthma and treatment?

- Whereabouts have you learnt most about asthma?

- What has changed the most about your understanding of asthma over time?

**Interview Conclusion:**

At the end of the interview, thank the participant and outline the next steps. The following points will be covered:

Explain next steps:

“We’ll now begin reviewing and analysing the interview data. As we do this, we may find areas where we’d like to explore something in more detail.”

Seek permission for follow-up:

“Would it be okay if we contacted you again—perhaps by phone—if we have any follow-up questions or if you’re open to meeting again to continue the discussion at a later time?”

Close with care:

“Thanks again for your time and openness. Please feel free to reach out to us if you have any questions or concerns after today.”
