# Supplementary material
Source: Research Square preprint supplement (doi:10.21203/rs.3.rs-10312612/v1)
Supplement: Supplementary file 2 [file d60bb802cdb3d04bf2da9c7c.docx]

**Supplemental File 2: Participant Life History Vignettes**

| Participant 1 | Participant 1 (60, M) immigrated to Australia from Northern Ireland in 1967 at age two, arriving by boat due to geopolitical unrest. They grew up in Melbourne, where their family ran a milk bar. He had a typical childhood, enjoying sports and later working as an aircraft engineer before transitioning into IT, eventually joining Monash University. Participant 1 has three daughters and lives in Richmond. They were diagnosed with mild asthma in his teens, which they managed with medication. Over time, they became more engaged with healthcare, participating in allergy studies and benefiting from newer treatments like Nucala to improve their quality of life. |
| --- | --- |
| Participant 2 | Participant 2 (57, F) is an academic and researcher originally from India, now based in Australia. Diagnosed with severe asthma at 21, they have faced frequent hospitalisations and ICU stays, including a near-fatal episode. Their condition worsened in Australia, but improved significantly after starting biologic treatment (Dupilumab) in 2023. Participant 2’s asthma shaped their personal and professional life they chose not to have children and adapted their career and social activities to manage fatigue. Their work with [advocacy organisation] and own [work] deepened their health literacy. Despite challenges, they view asthma as a transformative experience that made them more empathetic and resilient. |
| Participant 3 | Participant 3 (86, M) was born in 1938 to a sheep-farming family in Coleraine, Victoria. Their father, a former British army officer, died in WWII, leaving their mother to raise them and their siblings under immense stress. They developed asthma at a young age, likely triggered by emotional trauma and environmental factors. Despite severe early symptoms and frequent hospitalisations, they managed their condition well throughout life, becoming a successful teacher and school principal. Their asthma improved with age and stable family life, especially after marrying their wife. Together, they raised three accomplished children and built a supportive, active lifestyle that helped them manage their asthma effectively. |
| Participant 4 | Participant 4 (59, M) is an Australian-born man with Indigenous heritage. Diagnosed with asthma at age 6, they experienced frequent attacks throughout childhood and early adulthood, often triggered by exercise and cold weather. They were hospitalised multiple times and only received structured asthma care in their mid-20s while living in the UK. This marked a turning point, introducing them to care plans, preventers, and proper inhaler technique. Today, Participant 4 manages their asthma primarily with Ventolin and maintains a pragmatic approach. They reflect on past stigma and limited education around asthma, and have used their experience to support their son, who also has asthma. |
| Participant 5 | Participant 5 (60, M) was born in South Australia and has lived across Adelaide, Mildura, and Melbourne. Diagnosed with asthma from birth, they were encouraged to play sports to build lung capacity, which helped manage symptoms throughout their youth. Despite limited medical guidance early on, Participant 5 experienced severe asthma episodes, including a near-fatal attack in their 30s. Their understanding and management improved significantly in later life through support from the Asthma Foundation and personal research. They now uses Ventolin and Seretide with a spacer and tracks their condition proactively. They emphasise the importance of education, proper technique, and reducing stigma around asthma. |
| Participant 6 | Participant 6 (72, F) was diagnosed with asthma at six months old after contracting whooping cough. Their childhood was marked by frequent relocations across Australia, contributing to anxiety and asthma flare-ups. They also endured polio at age six. In the 1950s and 60s, asthma was poorly understood, and they faced stigma and isolation, often being dismissed by schools and doctors. Participant 6 later married an asthmatic and raised two sons who also developed asthma. Over time, their self-management improved with access to nebulisers, preventers, and supportive healthcare. Their resilience, shaped by early adversity and faith, continues to define their positive outlook and strength. |
